# Supplementary material for: Cobalt and copper pyridylmethylphosphonates with two- and three-dimensional structures and field-induced magnetic transitions
Source: Royal Society of Chemistry journal article supplement (doi:10.1039/c5dt03050a), 2015-01-01
Supplement: c5dt03050a1.pdf [file c5dt03050a1.pdf]

# Cobalt and copper pyridylmethylphosphonates with two- and three-dimensional structures and field-induced magnetic transitions

Ting-Hai Yang,<sup>a,c,d</sup> Zhong-Sheng Cai<sup>c</sup>, Fa-Nian Shi<sup>\*b,d</sup>, Li-Min Zheng<sup>\*c</sup>

<sup>a</sup> School of Chemistry & Environmental Engineering, Jiangsu University of Technology, Changzhou 213001, P. R. China.

<sup>b</sup> School of Science, Shenyang University of Technology, Shenyang 110870, P. R. China. E-mail: fshi96@foxmail.com.

<sup>c</sup> State Key Laboratory of Coordination Chemistry, School of Chemistry & Chemical Engineering, Nanjing University, Nanjing 210093, P. R. China. E-mail: lmzheng@nju.edu.cn

<sup>d</sup> Department of Chemistry, CICECO, University of Aveiro, 3810-193 Aveiro, Portugal.

## Supporting Information

### Contents

Figure S1: The layer structure of **1**.

Figure S2: The  $\pi$ - $\pi$  stacking interaction in compound **1**

Figure S3: Layer topological structure of **1**

Figure S4: Topological structure of **2**

Figure S5: PXRD pattern for compound **1** with simulated one from single crystal data

Figure S6: PXRD pattern for compound **2** with simulated one from single crystal data

Figure S7: TG curves of complexes **1** and **2**

Figure S8: The  $\chi_M^{-1}$  versus  $T$  plots for compound **1**

Figure S9: Temperature-dependent zero-field ac magnetic susceptibility for **1**

Figure S10: Differentiation of  $M$  versus  $H$  curve of **1**.

Figure S11: The  $\chi_M^{-1}$  versus  $T$  plots for compound **2**

Figure S12: Temperature-dependent zero-field ac magnetic susceptibility for **2**

Figure S13: Differentiation of  $M$  versus  $H$  curve of **3**.

Table S1 Selected bond lengths [ $\text{\AA}$ ] and angles [ $^\circ$ ] for **1**

Table S2 Selected bond lengths [ $\text{\AA}$ ] and angles [ $^\circ$ ] for **2**

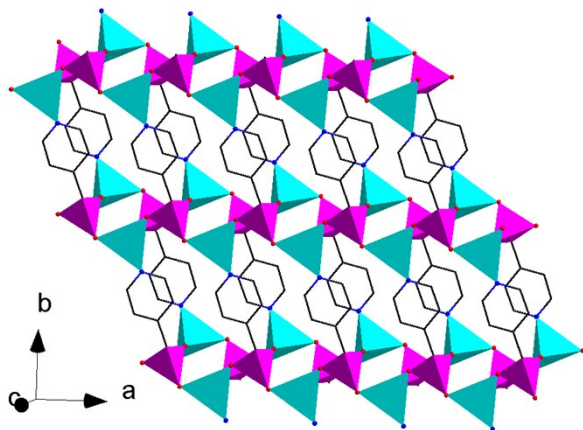

Figure S1 The layer structure of **1**. Cyan tetrahedron,  $\text{CoNO}_3$ ; pink tetrahedron,  $\text{PO}_3\text{C}$ .

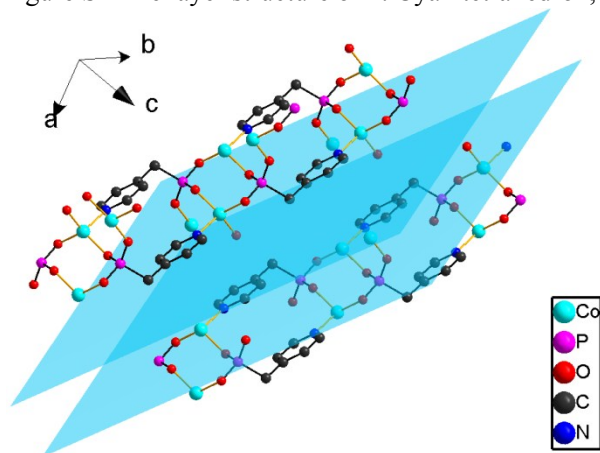

Figure S2 The  $\pi$ - $\pi$  stacking interaction in compound **1**.

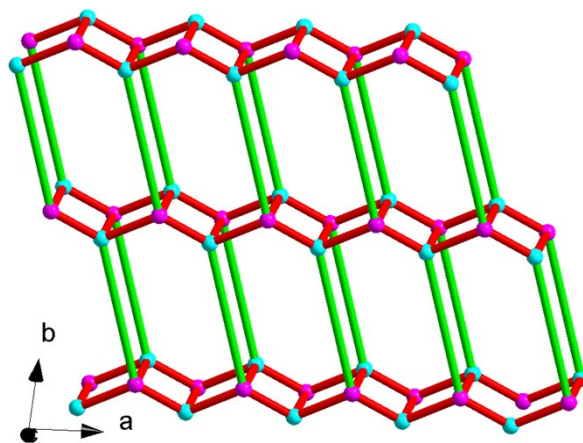

Figure S3 Layer topological structure of **1**. Cyan ball, Co atom; pink ball, P atom.

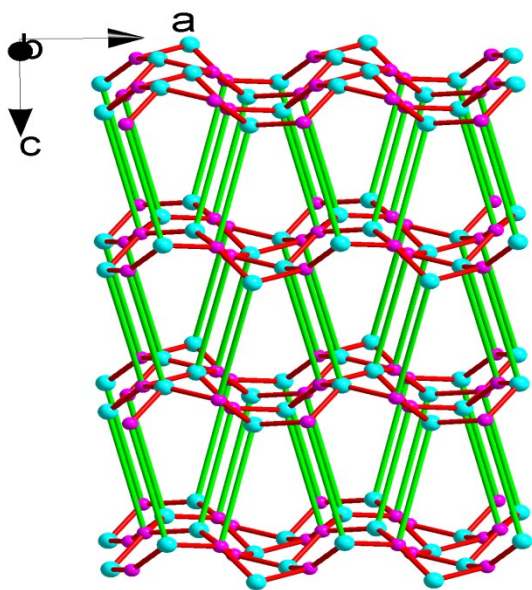

Figure S4 Topological structure of **2**. Cyan ball, Cu atom; pink ball, P atom.

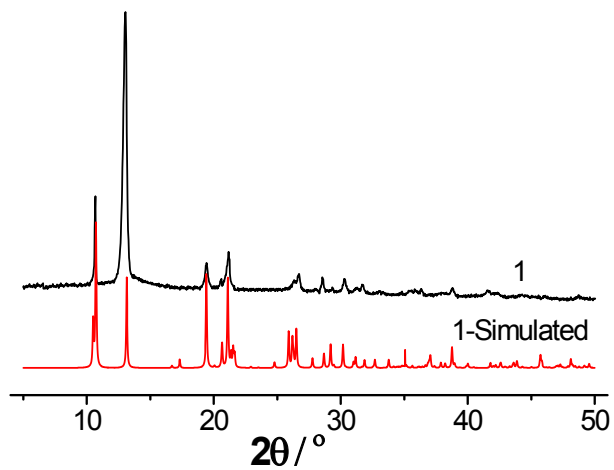

Figure S5 PXRD pattern for compound **1** with simulated one from single crystal data.

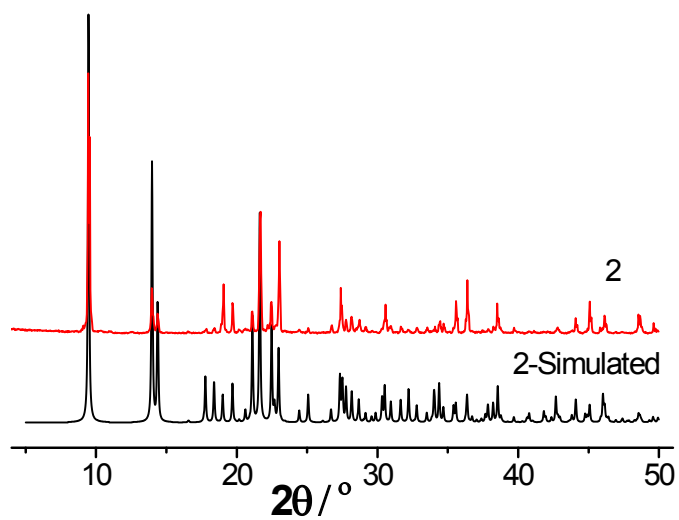

Figure S6 PXRD pattern for compound **2** with simulated one from single crystal data.

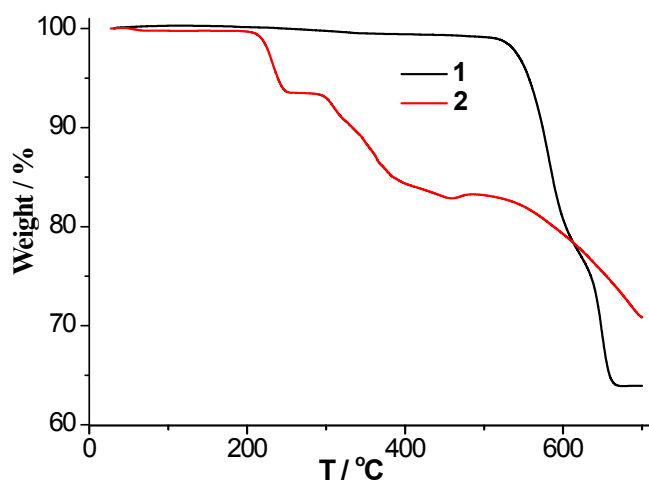

Figure S7 TG curves of complexes **1** and **2** (heating rate of 10 °Cmin<sup>-1</sup>).

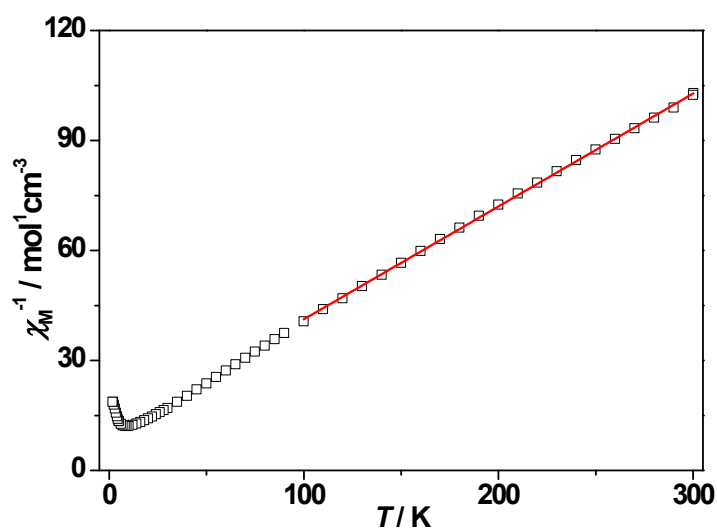

Figure S8 The  $\chi_M^{-1}$  versus T plots for compound **1**.

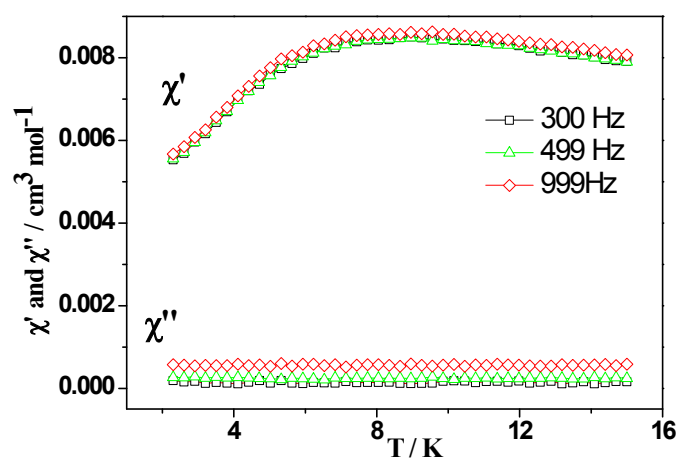

Figure S9 Temperature-dependent zero-field ac magnetic susceptibility for **1**.

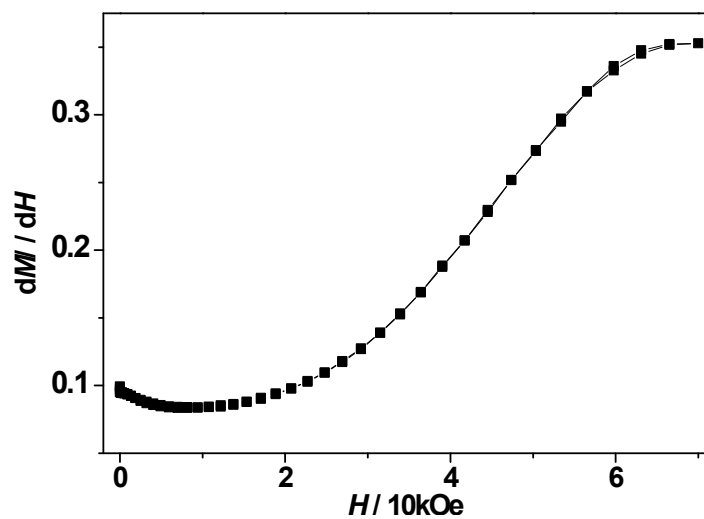

Figure S10 Differentiation of  $M$  versus  $H$  curve of **1**.

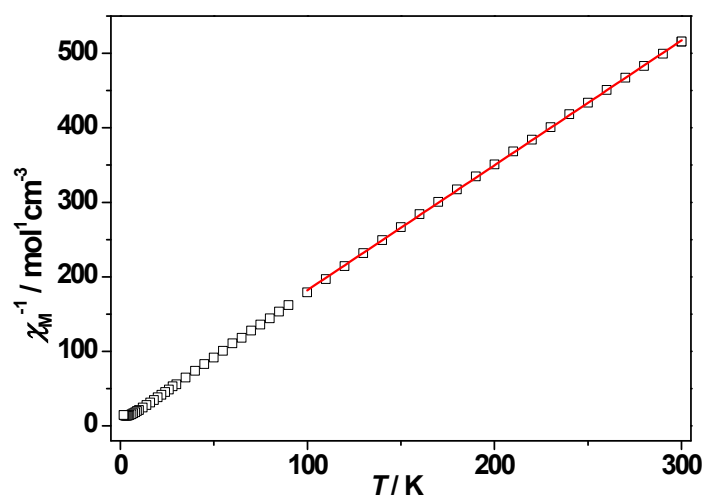

Figure S11 The  $\chi_M^{-1}$  versus  $T$  plots for compound **2**.

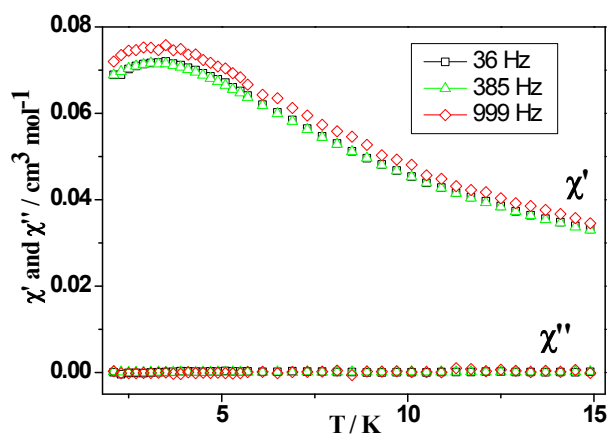

Figure S12 Temperature-dependent zero-field ac magnetic susceptibility for **2**.

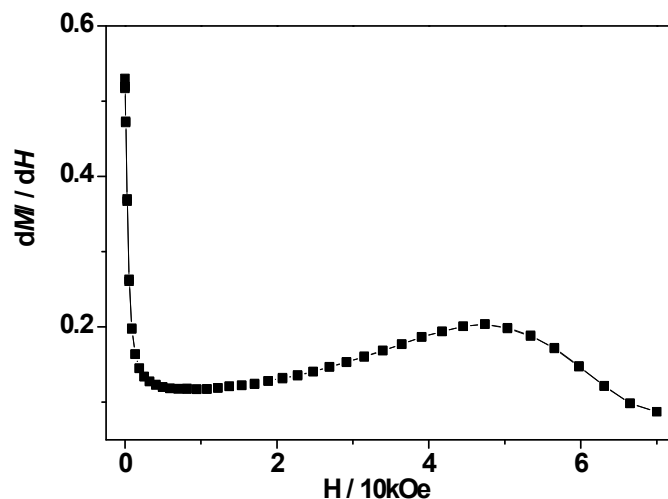

Figure S13 Differentiation of  $M$  versus  $H$  curve of **2**.

**Table S1** Selected bond lengths [ $\text{\AA}$ ] and angles [ $^\circ$ ] for **1**.

|                   |            |                   |            |
|-------------------|------------|-------------------|------------|
| Co(1)-O(2A)       | 1.937(2)   | P(1)-O(1)         | 1.530(2)   |
| Co(1)-O(1)        | 1.974(2)   | P(1)-O(2)         | 1.523(2)   |
| Co(1)-O(3B)       | 1.944(2)   | P(1)-O(3)         | 1.519(2)   |
| Co(1)-N(1C)       | 2.049(3)   | P(1)-C(1)         | 1.812(3)   |
| O(2A)-Co(1)-O(3B) | 120.64(10) | O(2A)-Co(1)-O(1)  | 115.65(10) |
| O(3B)-Co(1)-O(1)  | 107.94(9)  | O(2A)-Co(1)-N(1C) | 97.60(10)  |
| O(3B)-Co(1)-N(1C) | 109.50(10) | O(1)-Co(1)-N(1C)  | 103.49(10) |

Symmerty codes : A:  $-x+1,-y,-z+1$ ; B:  $x+1,y,z$ ; C:  $x-1,y,z$ .

**Table S2** Selected bond lengths [ $\text{\AA}$ ] and angles [ $^\circ$ ] for **2**.

|                   |            |                   |            |
|-------------------|------------|-------------------|------------|
| Cu(1)-O(1)        | 1.9579(14) | Cu(1)-N(1C)       | 2.2320(17) |
| Cu(1)-O(2B)       | 1.9938(14) | P(1)-O(1)         | 1.5181(13) |
| Cu(1)-O(3A)       | 1.9869(14) | P(1)-O(2)         | 1.5326(14) |
| Cu(1)-O(4)        | 1.9755(14) | P(1)-O(3)         | 1.5248(15) |
| O(1)-Cu(1)-O(3A)  | 90.26(6)   | O(1)-Cu(1)-O(2B)  | 89.43(6)   |
| O(4)-Cu(1)-O(3A)  | 86.61(6)   | O(4)-Cu(1)-O(2B)  | 91.22(6)   |
| O(1)-Cu(1)-N(1C)  | 95.86(6)   | O(4)-Cu(1)-N(1C)  | 92.93(6)   |
| O(3A)-Cu(1)-N(1C) | 90.01(6)   | O(2B)-Cu(1)-N(1C) | 105.57(6)  |

Symmerty codes : A:  $x+1/2,y,-z+3/2$ ; B:  $-x,y-1/2,-z+3/2$ ; C:  $x,-y+3/2,z+1/2$ .
